# Supplementary material for: Type I interferon and pattern recognition receptor signaling following particulate matter inhalation
Source: PubMed Central journal article supplement (PMC3537608; doi:10.1186/1743-8977-9-25), 2012-07-09
Supplement: 1743-8977-9-25-S1.pdf [file 1743-8977-9-25-S1.pdf]

## Additional file 1

### **Type I interferon and pattern recognition receptor signaling following particulate matter inhalation**

Aaron Erdely (efi4@cdc.gov)\*†, James M. Antonini (jga6@cdc.gov)\*, Rebecca Salmen-Muniz (zvj4@cdc.gov)\*†, Angie Liston (listonangie@yahoo.com)‡, Tracy Hulderman (tmh7@cdc.gov)\*†, Petia P. Simeonova (pns6@cdc.gov)‡¶, Michael L. Kashon (mqk1@cdc.gov)§, Shengqiao Li (lis2@upmc.edu)§, Ja K. Gu (gum4@cdc.gov)§, Samuel Stone (zhf9@cdc.gov)\*, Bean T. Chen (bdc4@cdc.gov)\*, David G. Frazer (dgl1@cdc.gov)\* and Patti C. Zeidler-Erdely (paz9@cdc.gov)\*

\*Pathology and Physiology Research Branch, †Laboratory for Occupational Cardiovascular Toxicology, ‡Toxicology and Molecular Biology Branch and

§Biostatistics and Epidemiology Branch, Health Effects Laboratory Division, National Institute for Occupational Safety and Health, Morgantown, WV

¶Deceased

“The findings and conclusions in this report are those of the author(s) and do not necessarily represent the views of the National Institute for Occupational Safety and Health”

**Corresponding author:** Aaron Erdely, PhD  
e-mail: [efi4@cdc.gov](mailto:efi4@cdc.gov)

**Supplemental Material, Table S1:** Genes comprising highlighted networks in whole blood cells

| <i>Whole Blood Cells</i>                                                           | <i>Fold Change</i> | <i>p value</i> |
|------------------------------------------------------------------------------------|--------------------|----------------|
| <i>4hr – “organismal development, infection mechanism, antimicrobial response”</i> |                    |                |
| AIMP1                                                                              | 1.134              | 0.01837        |
| ARRDC4                                                                             | -1.106             | 0.04899        |
| COMMD1                                                                             | 1.107              | 0.04396        |
| EOMES                                                                              | 1.103              | 0.00983        |
| F5                                                                                 | -1.248             | 0.01055        |
| IFI27                                                                              | 1.364              | 0.00318        |
| IFIT3                                                                              | 1.229              | 0.03232        |
| IFITM3                                                                             | 1.478              | 0.00191        |
| IKBKAP                                                                             | -1.118             | 0.02758        |
| IRF7                                                                               | 2.241              | 0.000001       |
| ISG15                                                                              | 1.956              | 0.00108        |
| OAS1                                                                               | 1.116              | 0.03961        |
| OASL                                                                               | 1.141              | 0.00626        |
| SLPI                                                                               | -1.289             | 0.03268        |
| SP100                                                                              | 1.206              | 0.00658        |
| Tgtp1                                                                              | 1.175              | 0.00057        |
| TLR7                                                                               | 1.146              | 0.04911        |
| TMEM154                                                                            | -1.101             | 0.01724        |
| TNFAIP2                                                                            | -1.126             | 0.04494        |
| TRAFD1                                                                             | 1.152              | 0.04786        |
| Trim30a/Trim30d                                                                    | 1.155              | 0.00919        |
| VWF                                                                                | -1.319             | 0.01835        |
| <i>28d – “organismal development, infection mechanism, antimicrobial response”</i> |                    |                |
| AES                                                                                | -1.274             | 0.03063        |
| CAMK2B                                                                             | -1.121             | 0.00020        |
| DHX58                                                                              | 1.120              | 0.02289        |
| DNTTIP1                                                                            | 1.179              | 0.00154        |
| FLII                                                                               | -1.143             | 0.03756        |
| HLA-B                                                                              | 1.193              | 0.03445        |
| IFI27                                                                              | 1.331              | 0.00595        |
| IFI27L2                                                                            | 1.914              | 0.00505        |
| IFI35                                                                              | 1.161              | 0.01134        |
| IRF7                                                                               | 1.862              | 0.00003        |
| ISG15                                                                              | 1.817              | 0.00300        |
| ISG20                                                                              | -1.335             | 0.04219        |
| LY96                                                                               | 1.175              | 0.01304        |
| NUB1                                                                               | -1.161             | 0.03025        |
| OAS1                                                                               | 1.254              | 0.00014        |
| OAS2                                                                               | 1.232              | 0.01725        |
| RAB31                                                                              | -1.189             | 0.04853        |
| SELPLG                                                                             | -1.328             | 0.04275        |
| SUMO1                                                                              | 1.125              | 0.01659        |
| TLR7                                                                               | 1.158              | 0.03480        |
| TRAF7                                                                              | 1.174              | 0.00619        |
| Trim30a/Trim30d                                                                    | 1.159              | 0.00799        |
| UBE2L3                                                                             | -1.109             | 0.03288        |
| USP18                                                                              | 1.344              | 0.00788        |
| ZFHX2                                                                              | -1.104             | 0.00594        |

**Supplemental Material, Table S2:** The most differentially expressed genes by fold change in the blood and aorta at 4 hr and 28 d post-inhalation exposure.

|              | 4hr – Fold Change |       |                 |       | 28d – Fold Change |       |                |       |
|--------------|-------------------|-------|-----------------|-------|-------------------|-------|----------------|-------|
|              | Increase          |       | Decrease        |       | Increase          |       | Decrease       |       |
| <b>Blood</b> | <i>Irf7</i>       | 2.241 | <i>Mmp9</i>     | 1.502 | <i>Ifi2712a</i>   | 1.914 | <i>Ctsw</i>    | 1.372 |
|              | <i>Oasl2</i>      | 2.021 | <i>Slc40a1</i>  | 1.423 | <i>Irf7</i>       | 1.862 | <i>Tubb1</i>   | 1.371 |
|              | <i>Isg15</i>      | 1.956 | <i>Tgfbi</i>    | 1.355 | <i>Oasl2</i>      | 1.856 | <i>Plagl2</i>  | 1.370 |
|              | <i>Ifitm3</i>     | 1.478 | <i>Vwf</i>      | 1.319 | <i>Isg15</i>      | 1.817 | <i>Aip</i>     | 1.355 |
|              | <i>Lgals3bp</i>   | 1.473 | <i>Cdk13</i>    | 1.309 | <i>Usp18</i>      | 1.344 | <i>Isg20</i>   | 1.335 |
|              | <i>Ppp1r15a</i>   | 1.460 | <i>Slpi</i>     | 1.289 | <i>Ifi2711</i>    | 1.331 | <i>Selplg</i>  | 1.328 |
|              | <i>Rnf114</i>     | 1.415 | <i>F5</i>       | 1.248 | <i>Atox1</i>      | 1.316 | <i>Wbp11</i>   | 1.327 |
|              | <i>Usp18</i>      | 1.385 | <i>Myh9</i>     | 1.241 | <i>Shfm1</i>      | 1.304 | <i>Thy1</i>    | 1.302 |
|              | <i>Ifi27</i>      | 1.364 | <i>Isy1</i>     | 1.210 | <i>Clcn3</i>      | 1.270 | <i>Ssc24b</i>  | 1.296 |
|              | <i>H2-d1</i>      | 1.331 | <i>Lbr</i>      | 1.191 | <i>Oas1b</i>      | 1.254 | <i>Klf7</i>    | 1.295 |
|              |                   |       |                 |       |                   |       |                |       |
| <b>Aorta</b> | <i>Lgals3bp</i>   | 2.091 | <i>Tfrc</i>     | 1.273 | <i>Lgals3bp</i>   | 1.586 | <i>Pln</i>     | 1.468 |
|              | <i>Gbp4</i>       | 1.904 | <i>Ivns1abp</i> | 1.199 | <i>Thsd4</i>      | 1.555 | <i>Hist4h4</i> | 1.386 |
|              | <i>Irgm2</i>      | 1.660 | <i>Ndufaf4</i>  | 1.196 | <i>Klf6</i>       | 1.359 | <i>Car3</i>    | 1.298 |
|              | <i>Ifi2712a</i>   | 1.586 | <i>Slc6a6</i>   | 1.165 | <i>Mylk</i>       | 1.333 | <i>Nnmt</i>    | 1.239 |
|              | <i>Ifit3</i>      | 1.555 | <i>Atp5c1</i>   | 1.151 | <i>Myh11</i>      | 1.312 | <i>Adipoq</i>  | 1.193 |
|              | <i>Usp18</i>      | 1.533 | <i>Large</i>    | 1.145 | <i>Actn1</i>      | 1.247 | <i>Acot13</i>  | 1.188 |
|              | <i>Rsad2</i>      | 1.411 | <i>Acss1</i>    | 1.143 | <i>Csrp1</i>      | 1.240 | <i>Ndufs8</i>  | 1.187 |
|              | <i>Isg15</i>      | 1.360 | <i>Cct4</i>     | 1.141 | <i>Nox4</i>       | 1.230 | <i>Mrps15</i>  | 1.187 |
|              | <i>H2-Aa</i>      | 1.335 | <i>Cops2</i>    | 1.130 | <i>Fblim1</i>     | 1.229 | <i>Ffar2</i>   | 1.187 |
|              | <i>Irf9</i>       | 1.306 | <i>Btbd1</i>    | 1.125 | <i>Golim4</i>     | 1.227 | <i>Cidec</i>   | 1.181 |

**Supplemental Material, Table S3: Genes comprising highlighted networks in aorta**

| <i>Aorta</i>                                                                                  | <i>Fold Change</i> | <i>p value</i> |
|-----------------------------------------------------------------------------------------------|--------------------|----------------|
| <i>4hr – “antimicrobial response, inflammatory response, post-translational modification”</i> |                    |                |
| EIF2AK2                                                                                       | 1.188              | 0.00705        |
| GBP4                                                                                          | 1.904              | 0.00837        |
| HLA-B                                                                                         | 1.179              | 0.01133        |
| HLA-C                                                                                         | 1.148              | 0.00368        |
| HLA-DQA1                                                                                      | 1.335              | 0.03372        |
| HLA-E                                                                                         | 1.256              | 0.00735        |
| IFI27L2                                                                                       | 1.586              | 0.00006        |
| IFIT2                                                                                         | 1.102              | 0.03688        |
| IFIT3                                                                                         | 1.555              | 0.01550        |
| IRF7                                                                                          | 1.109              | 0.01657        |
| IRF9                                                                                          | 1.306              | 0.00870        |
| ISG15                                                                                         | 1.360              | 0.01873        |
| LGALS3BP                                                                                      | 2.091              | 0.00139        |
| PIM3                                                                                          | 1.157              | 0.00834        |
| RPS2                                                                                          | -1.120             | 0.00525        |
| RSAD2                                                                                         | 1.411              | 0.04881        |
| Trim30a/Trim30d                                                                               | 1.110              | 0.01709        |
| USP18                                                                                         | 1.533              | 0.01701        |

**Supplemental Material, Table S4: Genes comprising highlighted networks in lung**

| <i>Lung</i>                                                                                             | <i>Fold Change</i> | <i>p value</i> |
|---------------------------------------------------------------------------------------------------------|--------------------|----------------|
| <b><i>4hr – “dermatological diseases and conditions, genetic disorders, antimicrobial response”</i></b> |                    |                |
| ADAR                                                                                                    | 1.452              | 2.17E-09       |
| CASP1                                                                                                   | 1.317              | 8.13E-04       |
| CYBA                                                                                                    | 1.371              | 2.24E-05       |
| ELN                                                                                                     | 1.325              | 5.50E-03       |
| FAM198B                                                                                                 | -1.369             | 1.39E-07       |
| GBP2                                                                                                    | 1.660              | 1.49E-04       |
| GDF10                                                                                                   | -1.446             | 1.17E-06       |
| HSD11B1                                                                                                 | -1.404             | 1.01E-06       |
| IFI27L2                                                                                                 | 5.136              | 7.21E-12       |
| IFI30                                                                                                   | 1.310              | 2.45E-05       |
| IFI35                                                                                                   | 1.453              | 2.50E-06       |
| Ifi47                                                                                                   | 2.290              | 4.48E-05       |
| IFIH1                                                                                                   | 1.306              | 1.16E-07       |
| IFIT2                                                                                                   | 3.257              | 5.01E-09       |
| IFIT3                                                                                                   | 4.685              | 3.05E-10       |
| IFITM3                                                                                                  | 1.640              | 2.69E-06       |
| IRF7                                                                                                    | 4.730              | 2.57E-10       |
| IRF9                                                                                                    | 1.833              | 2.11E-08       |
| ISG15                                                                                                   | 7.401              | 5.15E-11       |
| LGALS3                                                                                                  | 1.680              | 1.50E-11       |
| LGALS3BP                                                                                                | 4.675              | 1.56E-13       |
| LRAT                                                                                                    | -1.731             | 6.83E-05       |
| MX1                                                                                                     | 2.076              | 2.69E-09       |
| NOXO1                                                                                                   | 1.438              | 1.37E-05       |
| OAS2                                                                                                    | 3.340              | 2.07E-09       |
| Oasl2                                                                                                   | 4.552              | 7.04E-12       |
| PPIC                                                                                                    | 1.408              | 9.60E-07       |
| SERPINF1                                                                                                | -1.327             | 4.22E-07       |
| TAP1                                                                                                    | 1.604              | 2.05E-05       |
|                                                                                                         |                    |                |
| <b><i>28d – “antimicrobial response, inflammatory response, infection mechanism”</i></b>                |                    |                |
| CD83                                                                                                    | 1.743              | 1.55E-09       |
| CTLA4                                                                                                   | 1.505              | 4.96E-08       |
| DDX58                                                                                                   | 1.630              | 2.42E-07       |
| DHX58                                                                                                   | 2.157              | 2.35E-08       |
| GDF15                                                                                                   | 1.523              | 4.73E-14       |
| GPC3                                                                                                    | -1.343             | 3.20E-07       |
| H2-Q8                                                                                                   | 1.767              | 3.67E-03       |
| HLA-DQB1 (includes others)                                                                              | 1.628              | 2.39E-04       |
| HLA-DRB1                                                                                                | 1.449              | 4.11E-04       |
| IFI30                                                                                                   | 1.556              | 6.74E-09       |
| IFI35                                                                                                   | 1.338              | 8.09E-05       |
| IFIT3                                                                                                   | 4.678              | 3.12E-10       |
| IRF7                                                                                                    | 3.647              | 1.02E-08       |
| IRF9                                                                                                    | 1.710              | 1.91E-07       |
| ISG15                                                                                                   | 4.593              | 1.33E-08       |
| LAMP3                                                                                                   | 1.473              | 6.97E-07       |
| Ly6a (includes others)                                                                                  | 1.365              | 9.82E-08       |
| MZB1                                                                                                    | 1.538              | 9.51E-03       |

|       |       |          |
|-------|-------|----------|
| OASL  | 1.881 | 3.79E-07 |
| OSMR  | 1.396 | 3.56E-08 |
| RSAD2 | 4.527 | 4.26E-08 |
| STAT2 | 1.573 | 1.88E-06 |

**Supplemental Material, Table S5:** Serum analytes contained in RodentMAP v2.0. \* p<0.05 vs respective AIR sham.

| Analytes                                                  | Units | 4hr (n=4/group) |            | 28d (n=4/group) |             |
|-----------------------------------------------------------|-------|-----------------|------------|-----------------|-------------|
|                                                           |       | AIR             | GMA-SS     | AIR             | GMA-SS      |
| Apo A1 (Apolipoprotein A1)                                | ug/mL | 45.2±4.1        | 43.7±1.4   | 37.5±0.9        | 35.9±0.5    |
| CD40                                                      | pg/mL | 90.7±6.0        | 95.8±10.4  | 96.2±3.8        | 106.6±5.5   |
| CD40 Ligand                                               | pg/mL | 436.0±26.6      | 500.0±48.6 | 1970.0±206.7    | 1605.0±40.9 |
| CRP (C Reactive Protein)                                  | ug/mL | 6.5±0.3         | 5.7±0.1*   | 5.5±0.3         | 6.2±0.6     |
| EGF (Epidermal Growth Factor)                             | pg/mL | 33.0±6.4        | 42.0±4.1   | 62.5±7.7        | 44.7±9.8    |
| Endothelin-1                                              | pg/mL | 37.0±8.3        | 58.1±5.8   | 50.1±4.0        | 40.6±6.2    |
| Eotaxin                                                   | pg/mL | 990.0±65.7      | 979.8±48.4 | 563.0±42.7      | 470.3±38.0  |
| Factor VII                                                | ng/mL | 8.9±0.6         | 9.9±0.5    | 41.7±2.4        | 36.2±3.8    |
| FGF-9 (Fibroblast Growth Factor-9)                        | ng/mL | BLD             | BLD        | BLD             | BLD         |
| FGF-basic (Fibroblast Growth Factor-basic)                | ng/mL | 4.8±0.1         | 4.2±0.5    | 12.2±0.3        | 10.9±0.4*   |
| Fibrinogen                                                | ug/mL | n/a             | n/a        | n/a             | n/a         |
| GCP-2 (Granulocyte Chemotactic Protein-2)                 | ng/mL | 35.0±2.9        | 36.4±1.6   | 26.3±4.2        | 21.2±4.1    |
| GM-CSF (Granulocyte Macrophage-Colony Stimulating Factor) | pg/mL | BLD             | BLD        | BLD             | BLD         |
| GST-alpha (Glutathione S-Transferase alpha)               | ng/mL | BLD             | BLD        | BLD             | BLD         |
| Haptoglobin                                               | ug/mL | 42.0±9.3        | 28.6±3.5   | 24.5±2.0        | 28.1±7.8    |
| IFN-gamma (Interferon-gamma)                              | pg/mL | BLD             | BLD        | 7.5±1.6         | 7.0±1.5     |
| IgA (Immunoglobulin A)                                    | ug/mL | 19.7±2.5        | 35.8±9.7   | 34.0±1.9        | 26.5±1.8*   |
| IL-10 (Interleukin-10)                                    | pg/mL | 352.3±6.3       | 324.5±24.8 | BLD             | BLD         |
| IL-11 (Interleukin-11)                                    | pg/mL | BLD             | BLD        | BLD             | BLD         |
| IL-12p70 (Interleukin-12p70)                              | ng/mL | BLD             | BLD        | BLD             | BLD         |
| IL-17 (Interleukin-17)                                    | ng/mL | BLD             | BLD        | BLD             | BLD         |
| IL-18 (Interleukin-18)                                    | ng/mL | 4.0±0.1         | 4.3±0.2    | 14.4±1.1        | 16.1±1.4    |
| IL-1alpha (Interleukin-1alpha)                            | pg/mL | 227.0±17.4      | 209.3±34.4 | 212.3±74.4      | 198.0±35.8  |
| IL-1beta (Interleukin-1beta)                              | ng/mL | 8.9±0.4         | 8.8±0.4    | 17.2±0.6        | 17.2±0.3    |
| IL-2 (Interleukin-2)                                      | pg/mL | BLD             | BLD        | BLD             | BLD         |
| IL-3 (Interleukin-3)                                      | pg/mL | BLD             | BLD        | BLD             | BLD         |
| IL-4 (Interleukin-4)                                      | pg/mL | BLD             | BLD        | BLD             | BLD         |
| IL-5 (Interleukin-5)                                      | ng/mL | 1.2±0.1         | 1.2±0.1    | 0.2±0.0         | 0.3±0.0     |

|                                                                           |       |             |              |             |              |
|---------------------------------------------------------------------------|-------|-------------|--------------|-------------|--------------|
| IL-6 (Interleukin-6)                                                      | pg/mL | BLD         | BLD          | BLD         | BLD          |
| IL-7 (Interleukin-7)                                                      | ng/mL | BLD         | BLD          | BLD         | BLD          |
| IP-10 (Inducible Protein-10)                                              | pg/mL | 48.6±7.1    | 69.5±11.8    | 62.4±3.6    | 92.7±16.9    |
| KC/GROalpha (Melanoma Growth Stimulatory Activity Protein)                | ng/mL | BLD         | BLD          | BLD         | BLD          |
| LIF (Leukemia Inhibitory Factor)                                          | pg/mL | 707.3±12.1  | 632.5±16.2*  | 1545.0±76.9 | 1610.0±91.7  |
| Lymphotoctin                                                              | pg/mL | 97.9±6.3    | 99.0±10.7    | 91.3±5.5    | 87.9±6.0     |
| MCP-1 (Monocyte Chemoattractant Protein-1)                                | pg/mL | 58.1±4.0    | 71.6±6.4     | 70.3±9.9    | 65.3±12.0    |
| MCP-3 (Monocyte Chemoattractant Protein-3)                                | pg/mL | 138.3±12.4  | 146.3±15.8   | 105.5±12.2  | 115.9±19.4   |
| MCP-5 (Monocyte Chemoattractant Protein-5)                                | pg/mL | 21.7±2.7    | 21.7±2.1     | 18.3±1.1    | 20.2±1.8     |
| M-CSF (Macrophage-Colony Stimulating Factor)                              | ng/mL | 6.3±0.2     | 6.1±0.2      | 7.0±0.2     | 7.0±0.1      |
| MDC (Macrophage-Derived Chemokine)                                        | pg/mL | 806.8±22.8  | 786.8±32.8   | 627.3±50.1  | 563.8±51.5   |
| MIP-1alpha (Macrophage Inflammatory Protein-1alpha)                       | ng/mL | 0.8±0.1     | 0.8±0.0      | 1.8±0.1     | 1.9±0.0      |
| MIP-1beta (Macrophage Inflammatory Protein-1beta)                         | pg/mL | 42.3±6.0    | 58.0±13.4    | 99.3±2.2    | 96.8±6.8     |
| MIP-1gamma (Macrophage Inflammatory Protein-1gamma)                       | ng/mL | 21.0±1.1    | 19.2±1.3     | 16.3±0.4    | 17.4±0.6     |
| MIP-2 (Macrophage Inflammatory Protein-2)                                 | pg/mL | 18.9±0.3    | 20.3±1.5     | 19.3±2.7    | 15.4±1.7     |
| MIP-3beta (Macrophage Inflammatory Protein-3beta)                         | ng/mL | 1.5±0.0     | 1.5±0.0      | 3.1±0.2     | 3.0±0.1      |
| MMP-9 (Matrix Metalloproteinase-9)                                        | ng/mL | 152.8±12.5  | 112.7±9.2*   | 128.6±12.7  | 173.3±16.4   |
| MPO (Myeloperoxidase)                                                     | ng/mL | 57.1±3.3    | 48.8±1.3     | 59.3±3.2    | 62.6±1.4     |
| Myoglobin                                                                 | ng/mL | 8.0±0.1     | 7.3±0.6      | 9.5±0.7     | 8.5±0.5      |
| OSM (Oncostatin M)                                                        | ng/mL | 0.08±0.00   | 0.10±0.00*   | BLD         | BLD          |
| RANTES (Regulation Upon Activation, Normal T-Cell Expressed and Secreted) | pg/mL | BLD         | BLD          | BLD         | BLD          |
| SAP (Serum Amyloid P)                                                     | ug/mL | 23.7±2.2    | 23.1±1.1     | 21.1±1.1    | 19.5±1.4     |
| SCF (Stem Cell Factor)                                                    | pg/mL | 257.0±17.1  | 246.8±14.2   | 253.8±15.0  | 235±1.9      |
| SGOT (Serum Glutamic-Oxaloacetic Transaminase)                            | ug/mL | 15.1±0.8    | 18.0±4.2     | 70.1±5.1    | 70.9±5.9     |
| TIMP-1 (Tissue Inhibitor of Metalloproteinase Type-1)                     | ng/mL | 1.1±0.3     | 1.1±0.1      | 0.7±0.0     | 1.0±0.2      |
| Tissue Factor                                                             | ng/mL | 5.3±0.3     | 5.2±0.3      | 13.0±0.7    | 12.0±0.4     |
| TNF-alpha (Tumor Necrosis Factor-alpha)                                   | ng/mL | BLD         | BLD          | BLD         | BLD          |
| TPO (Thrombopoietin)                                                      | ng/mL | 52.7±1.9    | 51.4±3.6     | 106.0±1.1   | 109.3±1.7    |
| VCAM-1 (Vascular Cell Adhesion Molecule-1)                                | ng/mL | 1635.0±52.7 | 1590.0±101.6 | 1715.0±18.5 | 1890.0±23.8* |
| VEGF (Vascular Endothelial Cell Growth Factor)                            | pg/mL | 179.0±11.3  | 178.5±14.8   | 153.5±9.4   | 140.0±3.1    |
| vWF (von Willebrand Factor)                                               | ng/mL | 127.8±5.0   | 123.5±1.7    | 91.5±4.4    | 88.9±1.6     |



**Supplemental Material, Table S6:** Genes associated with PRR canonical pathway in lung (Figure S7).

|                | <b>4hr</b>         |                | <b>28d</b>         |                |
|----------------|--------------------|----------------|--------------------|----------------|
| <i>Gene</i>    | <i>Fold Change</i> | <i>p value</i> | <i>Fold Change</i> | <i>p value</i> |
| <i>C3</i>      | 1.504              | 1.74E-04       | 1.692              | 6.10E-06       |
| <i>C1qa</i>    | 1.993              | 4.72E-09       | 2.189              | 3.59E-10       |
| <i>C1qb</i>    | 2.571              | 4.24E-10       | 2.966              | 2.11E-11       |
| <i>C1qc</i>    | 2.383              | 1.69E-09       | 2.757              | 6.66E-11       |
| <i>Casp1</i>   | 1.317              | 8.13E-04       | 1.599              | 7.24E-07       |
| <i>Ccl5</i>    | 1.807              | 4.14E-04       | 1.536              | 6.94E-03       |
| <i>Clec7a</i>  | 1.440              | 1.49E-04       | 1.810              | 1.10E-07       |
| <i>Ddx58</i>   | 1.773              | 1.38E-08       | 1.630              | 2.42E-07       |
| <i>Eif2ak2</i> | 2.493              | 3.71E-09       | 2.206              | 5.70E-08       |
| <i>Ifih1</i>   | 1.306              | 1.16E-07       |                    |                |
| <i>Il1b</i>    |                    |                | 2.007              | 4.27E-05       |
| <i>Irf7</i>    | 4.730              | 2.57E-10       | 3.647              | 1.02E-08       |
| <i>Myd88</i>   | 1.348              | 1.66E-05       | 1.364              | 9.59E-06       |
| <i>(Oas2)</i>  | 3.340              | 2.07E-09       | 3.301              | 2.52E-09       |
| <i>Tlr2</i>    | 1.658              | 1.97E-07       | 1.791              | 1.48E-08       |
| <i>Tlr7</i>    |                    |                | 1.369              | 1.05E-05       |

**Supplemental Material, Table S7: Bronchoalveolar lavage parameters in C57BL/6J**

mice up to 28 d following 10 d of GMA-SS welding fume inhalation. \* p<0.05 vs sham.

|                    |        | <i>1d</i>   | <i>14d</i>  | <i>28d</i>  |
|--------------------|--------|-------------|-------------|-------------|
| LDH                | AIR    | 47±4        | 66±2        | 52±3        |
| (U/L)              | GMA-SS | 213±13*     | 214±13*     | 209±11*     |
| Albumin            | AIR    | 0.10±0.01   | 0.12±0.01   | 0.13±0.01   |
| (mg/ml)            | GMA-SS | 0.36±0.03*  | 0.32±0.03*  | 0.35±0.02*  |
| PMN                | AIR    | 0.00±0.00   | 0.10±0.10   | 0.77±0.50   |
| (10 <sup>4</sup> ) | GMA-SS | 6.43±1.95*  | 44.38±6.58* | 41.66±4.49* |
| Macrophages        | AIR    | 3.83±0.53   | 3.07±0.28   | 3.30±0.40   |
| (10 <sup>5</sup> ) | GMA-SS | 15.75±1.63* | 19.70±1.32* | 31.77±2.70* |
| Lymphocytes        | AIR    | 0.19±0.05   | 0.14±0.56   | 0.28±0.11   |
| (10 <sup>4</sup> ) | GMA-SS | 11.95±2.88* | 6.68±2.48   | 11.66±2.85* |

Mice were exposed to GMA-SS by inhalation for 10 d at 40 mg/m<sup>3</sup> for 3 hr/day and harvested at days 1, 14 and 28 d post-exposure. For bronchoalveolar lavage (BAL) collection, 0.6 mL of cold Ca<sup>+2</sup> and Mg<sup>+2</sup> free PBS was instilled into the lung and then withdrawn in anesthetized mice (first fraction BAL). Two subsequent lavages (1.0 mL each) were then collected. The supernatant of the first fraction was used to determine lactate dehydrogenase (LDH) and albumin. The cell pellet of both fractions was combined, resuspended in PBS, and used for cell enumeration and differential staining [3]. PMN = polymorphonuclear cells

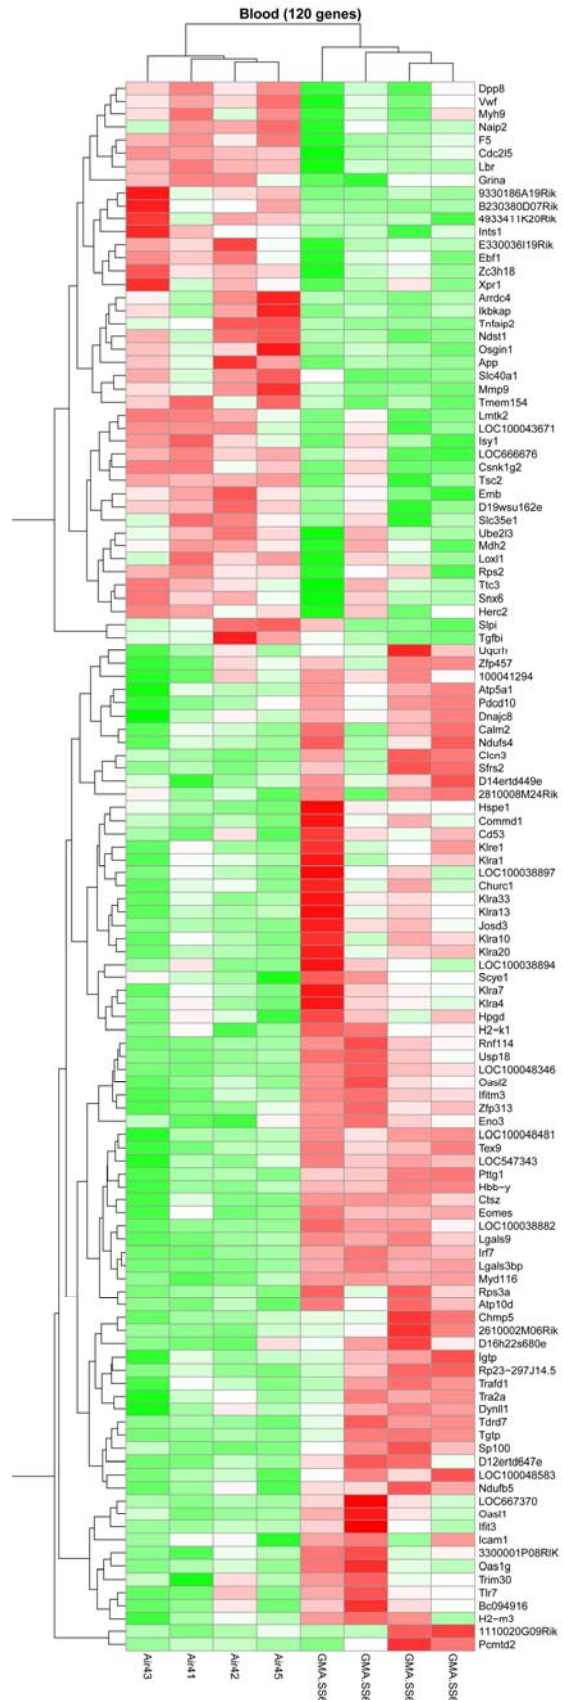

**Supplemental Material, Figure S1:** Hierarchical clustering analysis of differentially expressed genes in the blood of C57BL/6J mice exposed to GMA-SS welding fume or air at 4 hr post-exposure after p-value and fold change adjustment ( $p < 0.05$  and fold change of  $\pm 1.1$ ). The range of gene expression values are represented as the color scheme green-white-red which indicates low-moderate-high gene expression compared to the corresponding air control.

**Supplemental Material, Figure S2:** The network “organismal development, infection mechanism, antimicrobial response” in blood at 4hr. The network contained 22 of 35 focus molecules with a score of 44.

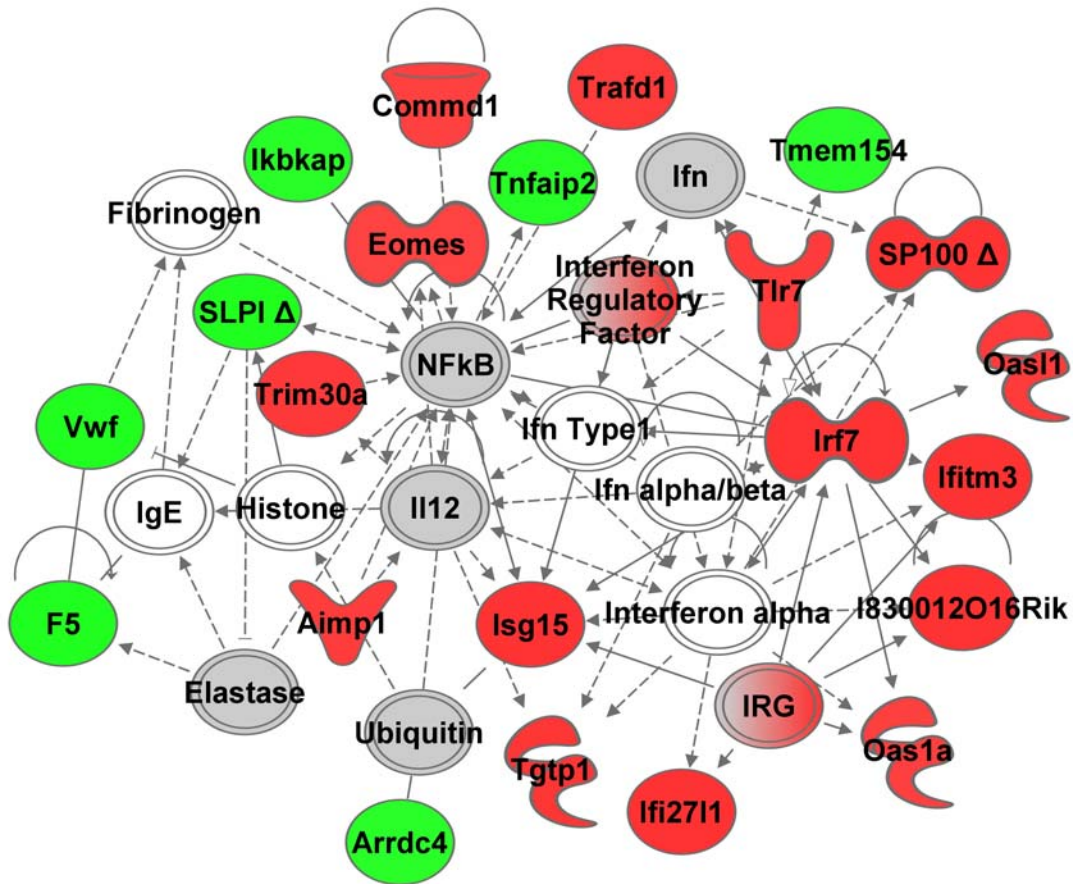

© 2000-2011 Ingenuity Systems, Inc. All rights reserved.

**Supplemental Material, Figure S3: Functional analysis for whole blood cells at 28d.**

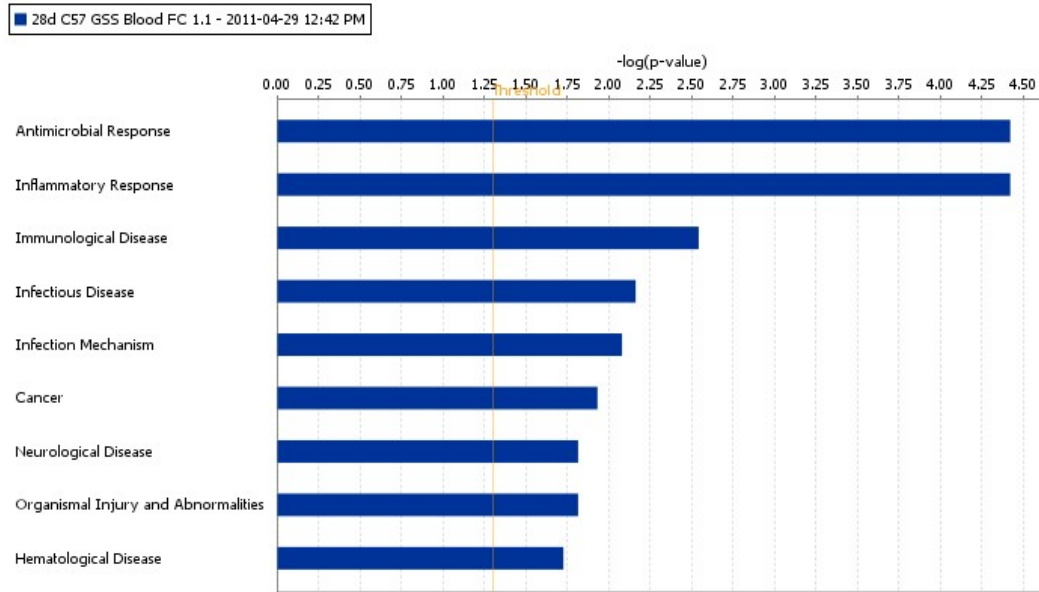

© 2000-2011 Ingenuity Systems, Inc. All rights reserved.

### Supplemental Material, Figure S4: Functional analysis for aorta at 4hr

4hr C57 G55 Aorta FC 1.1 - 2011-04-29 01:22 PM

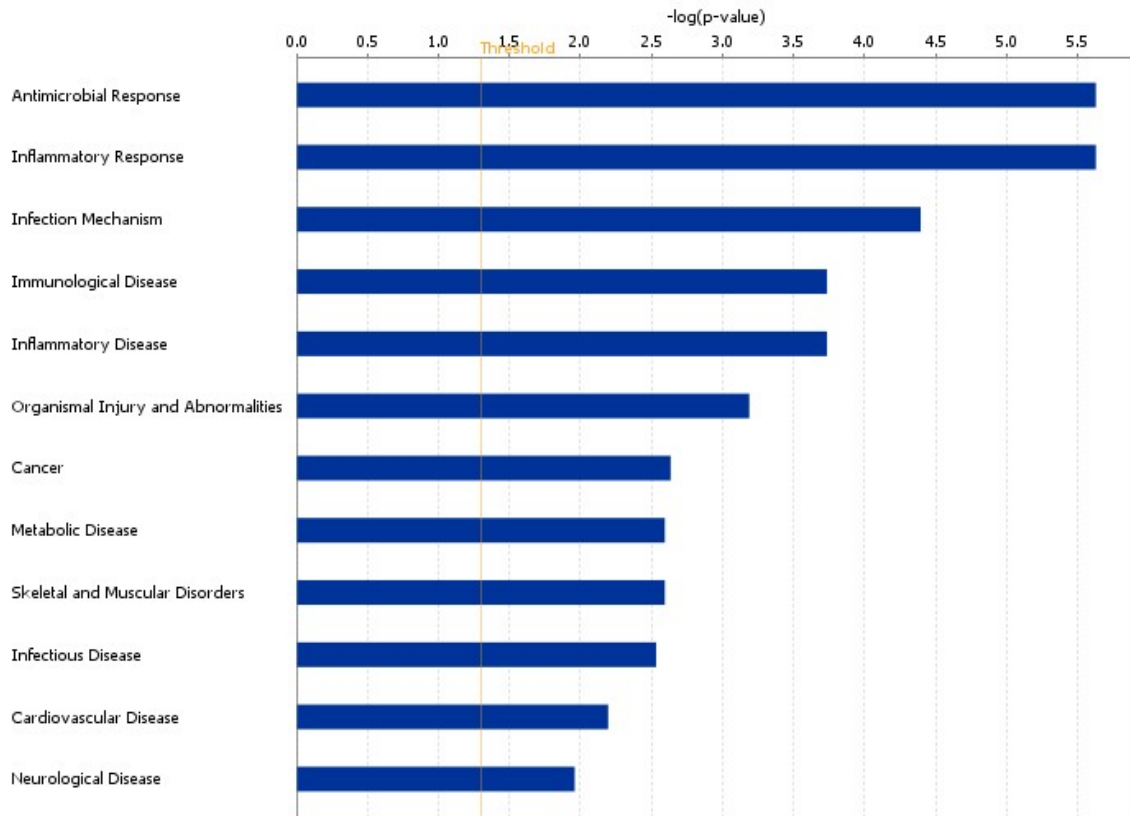

© 2000-2011 Ingenuity Systems, Inc. All rights reserved.

**Supplemental Material, Figure S5:** The network “dermatological diseases, genetic disorder, antimicrobial response” in lung at 4hr. The network contained 29 of 35 focus molecules with a score of 45.

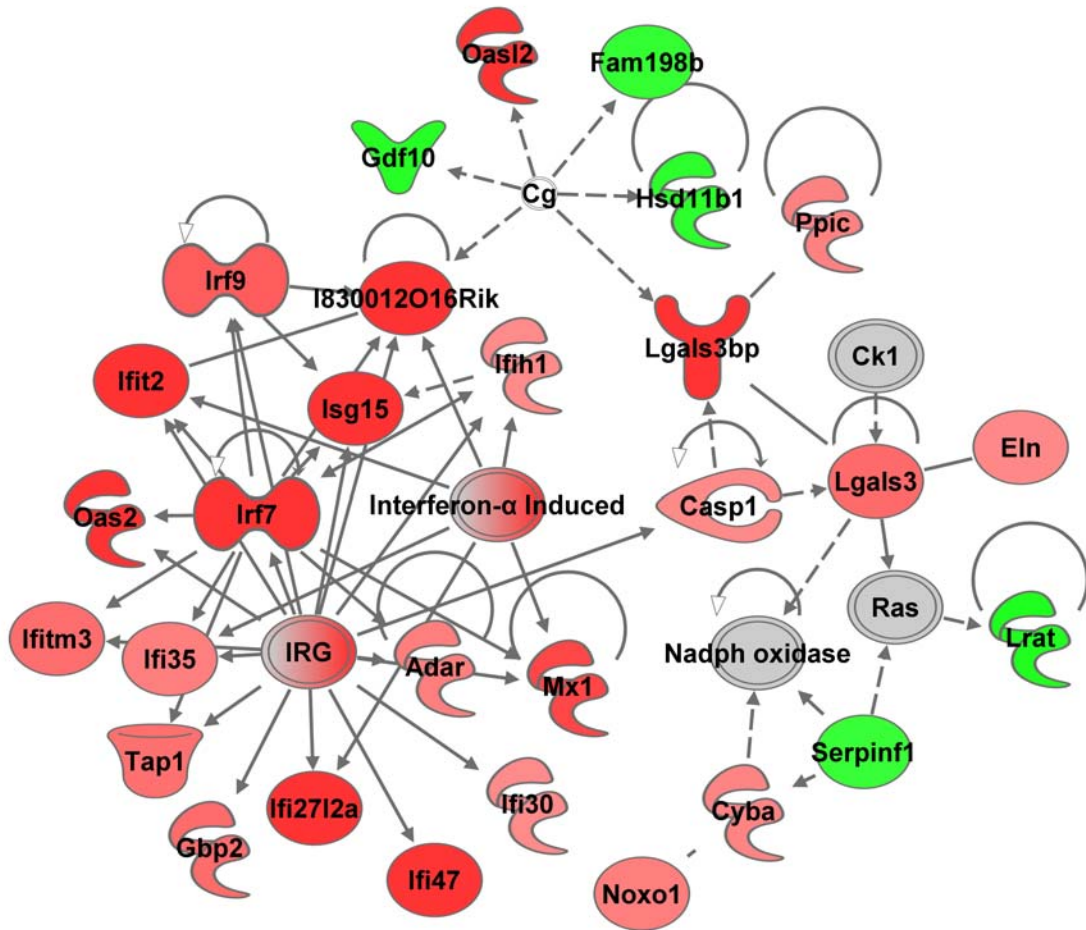

© 2000-2011 Ingenuity Systems, Inc. All rights reserved.

**Supplemental Material, Figure S6: Canonical pathway “activation of IRF by cytosolic PRR” in lung at 28d (p=8.6E-06).**

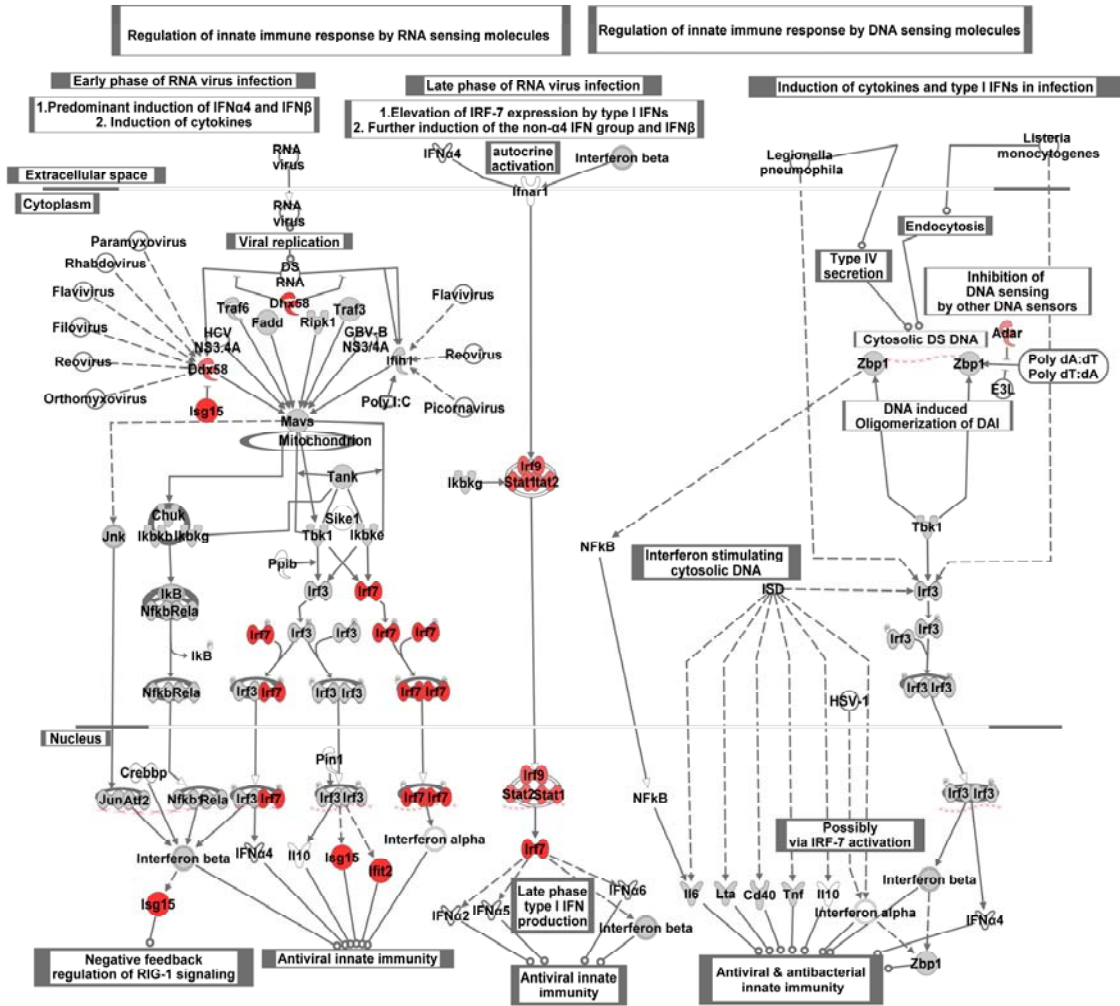



**Supplemental Material, Figure S7: Canonical pathway “role of PRR in recognition of bacteria and viruses” in lung at 28d (p=1.11E-09).**

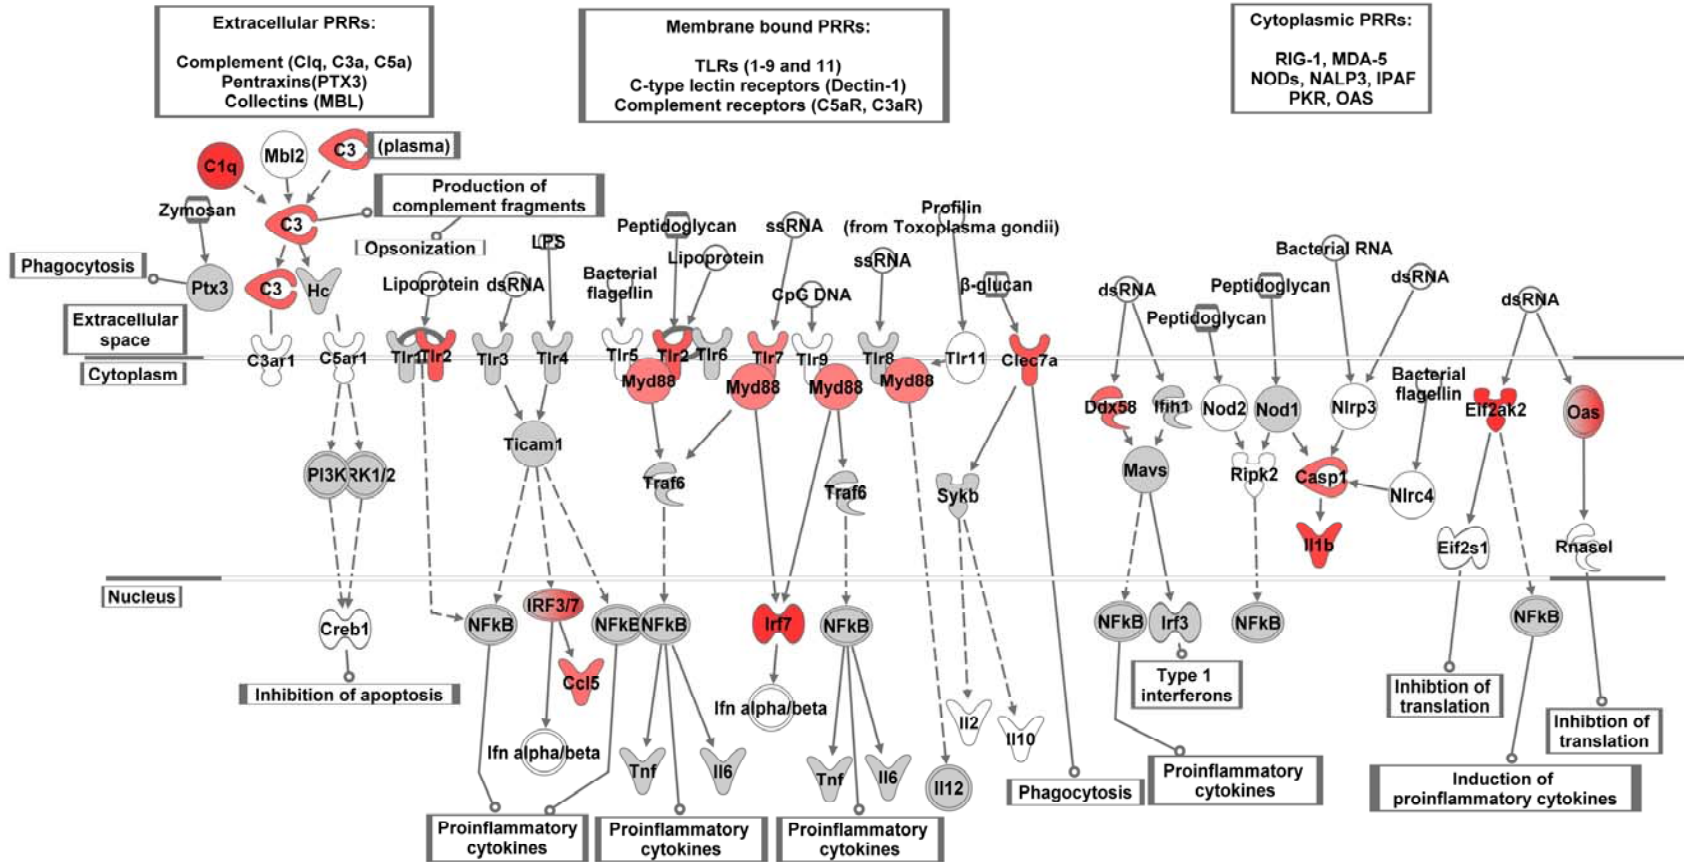

**Supplemental Material, Figure S8:** *Nlrp3* and associated gene expression by qRT-PCR in lung at 4 hr and 28 d. \*  $p < 0.05$  vs sham.

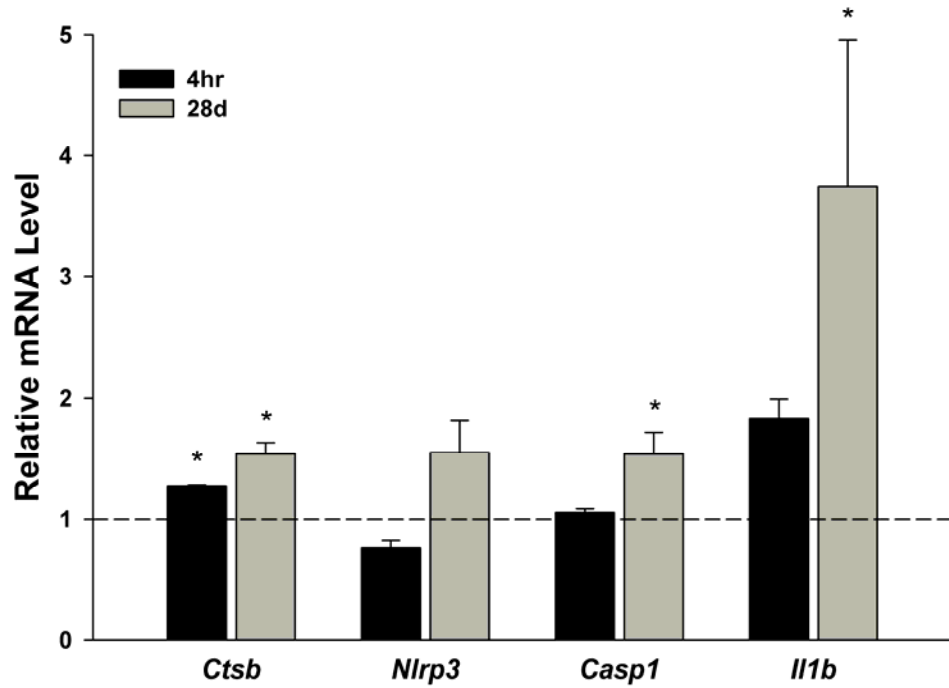

**Supplemental Material, Figure S9:** Cytotoxicity measured in bronchoalveolar lavage (BAL) and relative mRNA expression of inflammatory markers in the lung after various particle exposures. Male C57BL/6J mice were exposed to 340  $\mu\text{g}$  of gas metal arc – stainless steel (GMA-SS), 340  $\mu\text{g}$  gas metal arc – mild steel (GMA-MS), 40  $\mu\text{g}$  of multi-walled carbon nanotubes (MWCNT), or 40  $\mu\text{g}$  single-walled carbon nanotubes (SWCNT) (n=5 or 6 per group for all exposures) by pharyngeal aspiration and BAL was collected 24 hr post-exposure. Cytotoxicity (**A**) was measured by lactate dehydrogenase (LDH) activity and represented as percent (%) change from control (\* p<0.05). Specific inflammatory genes (**B**) represented include metallothionein 2 (*Mt2*), chemokine (C-X-C) motif ligand 1 (*Cxcl1*), interleukin-6 (*Il6*) and colony stimulating factor 3 (granulocyte) (*Csf3*). All values were significantly increased from respective sham.

**A:**

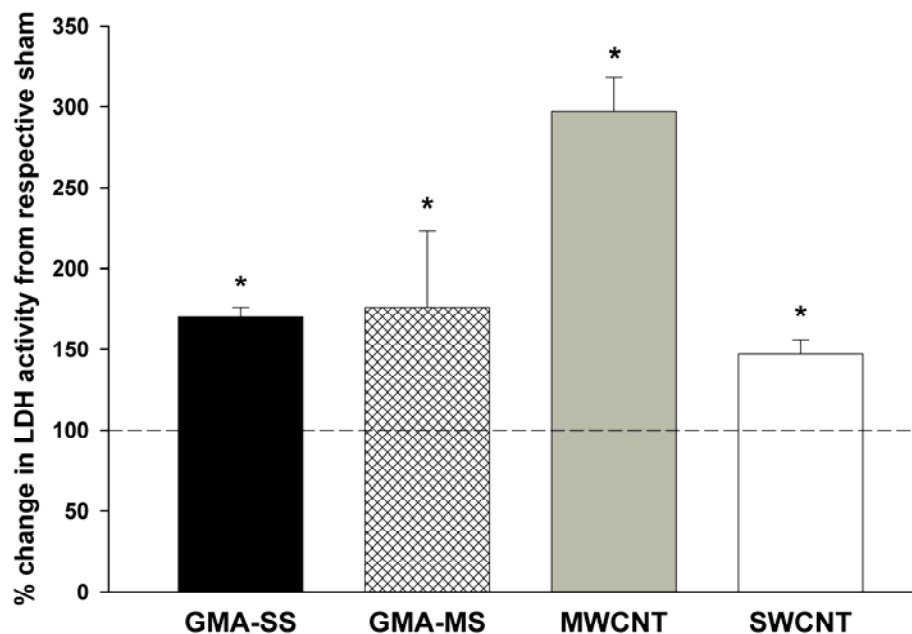

**B:**

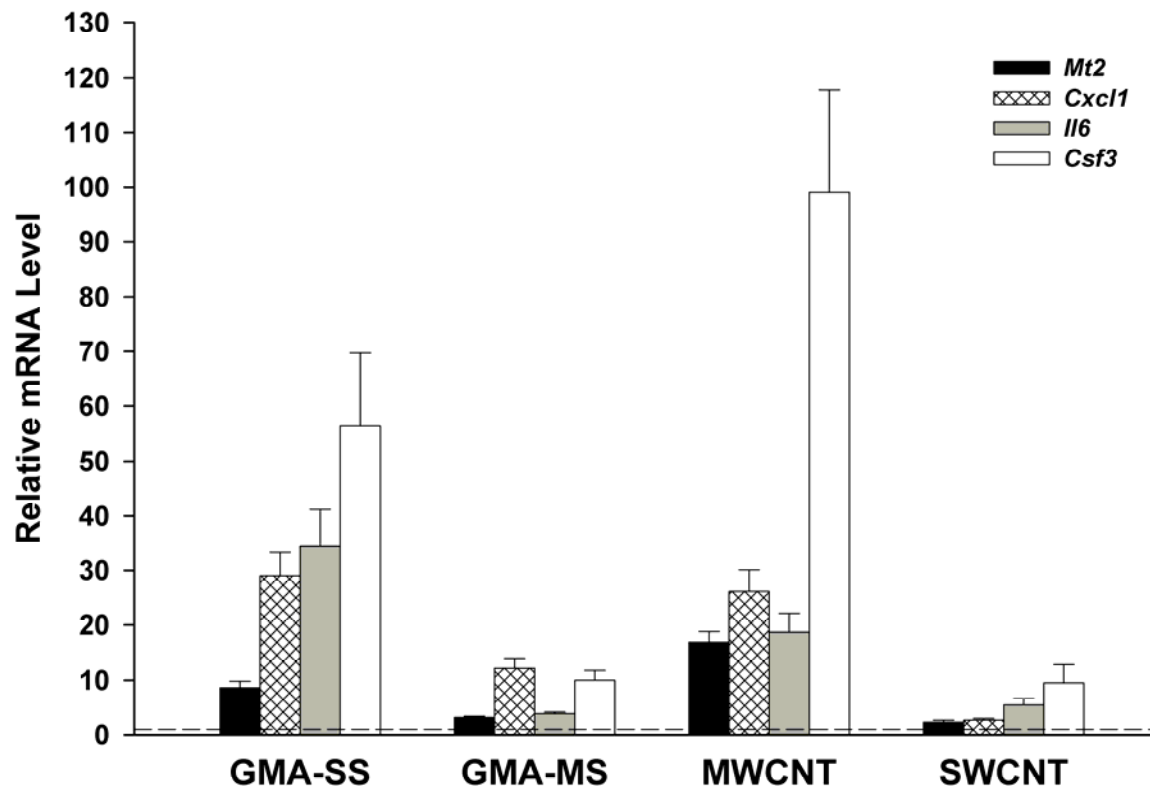

**Supplemental Material, Figure S10:** Legend to network pathway shapes

| Path Designer Shapes                                                                |                                   |
|-------------------------------------------------------------------------------------|-----------------------------------|
|    | Cytokine / Growth Factor          |
|    | Drug                              |
|    | Chemical / Toxicant               |
|    | Enzyme                            |
|    | G-protein Coupled Receptor        |
|    | Ion Channel                       |
|    | Kinase                            |
|  | Ligand-dependent Nuclear Receptor |
|  | Peptidase                         |
|  | Phosphatase                       |
|  | Transcription Regulator           |
|  | Translation Regulator             |
|  | Transmembrane Receptor            |
|  | Transporter                       |
|  | Complex / Group / Other           |
